# Supplementary material for: Lifespan extension without fertility reduction following dietary addition of the autophagy activator Torin1 in Drosophila melanogaster
Source: PubMed Central journal article supplement (PMC5766080; doi:10.1371/journal.pone.0190105), 2018-01-12
Supplement: pone.0190105.s004.pdf [file pone.0190105.s004.pdf]

**S1 Table. Fecundity of once-mated females held in agar vials with yeast droplet.** Mean egg production ( $\pm$ SE) over 3 days for once-mated females maintained in agar or SYA medium vials, each containing a droplet of live yeast paste (2mm diameter).

---

| Treatment                  | Mean egg production |                   |                   |                     |
|----------------------------|---------------------|-------------------|-------------------|---------------------|
|                            | Day 1 ( $\pm$ SE)   | Day 2 ( $\pm$ SE) | Day 3 ( $\pm$ SE) | All 3 days combined |
| Agar vials + yeast droplet | 44 (2.2)            | 55 (1.6)          | 66 (3.0)          | 55 (1.6)            |
| SYA vials + yeast droplet  | 39 (2.0)            | 60 (2.2)          | 77 (4.1)          | 59 (2.3)            |

---
