# Supplementary material for: Lifespan extension without fertility reduction following dietary addition of the autophagy activator Torin1 in Drosophila melanogaster
Source: PubMed Central journal article supplement (PMC5766080; doi:10.1371/journal.pone.0190105), 2018-01-12
Supplement: pone.0190105.s008.pdf [file pone.0190105.s008.pdf]

S3 Fig

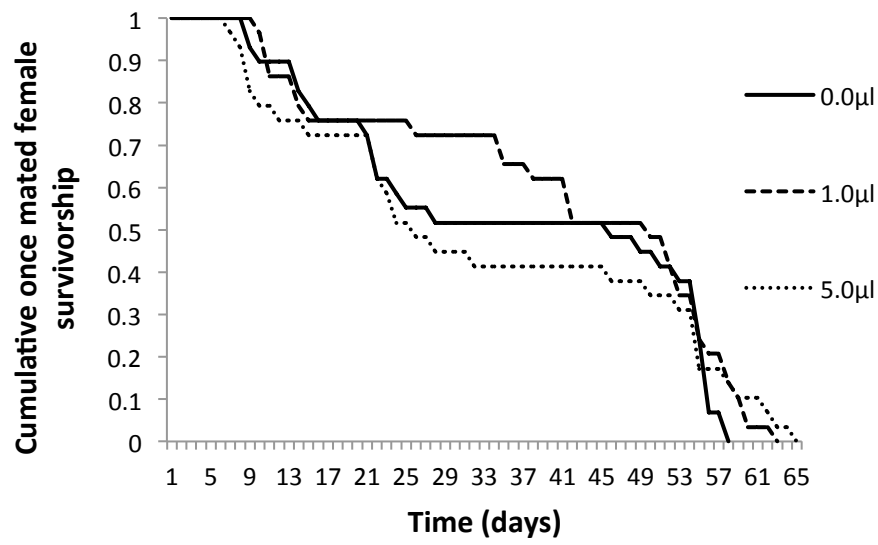

**S3 Fig. Survival of once-mated females on DMSO.** Survivorship against time (in days) of once-mated females held on agar vials seeded with 0, 1 or 5µl DMSO yeast droplet treatments.
